# Supplementary material
Source: Research Square preprint supplement (doi:10.21203/rs.3.rs-9241491/v1)
Supplement: Supplementary file 1 [file 37abec619ead10f2cfde1e70.docx]

# Supplementary Material

**Supplementary Table S1: Descriptive analysis of HCW's knowledge of Mpox disease, its transmission, signs and symptoms and precautions.**

|  | | | |
| --- | --- | --- | --- |
| **Knowledge Question** | **Best correct answer** | **Pre-session correct answers** | **Post session correct answers** |
| **General Knowledge of Mpox and Vaccines** | | | |
| Compared to Smallpox: Mpox is causing more severe disease. | FALSE | 531 (72.5) | 656 (85.4) |
| Jynneos is FDA-approved vaccine for the prevention of Mpox with dual activity against Smallpox and Mpox infections. | TRUE | 367 (50.1) | 674 (87.8) |
| Chickenpox vaccine, like Varivax, has dual activity against Chickenpox and Mpox infections. | FALSE | 179 (24.5) | 254 (33.1) |
| HCW exposed to a case of Monkeypox should receive Postexposure prophylaxis (PEP) with smallpox vaccine: | TRUE | 461 (63) | 647 (84.2) |
| Before the rash appearance, the symptoms of COVID-19 and Monkeypox are very similar. | TRUE | 512 (69.9) | 577 (75.1) |
| Monkeypox is caused by A virus from Pox family | TRUE | 485 (66.3) | 577 (75.1) |
| **Modes of Mpox Transmission** | | | |
| Animal to human | TRUE | 356 (48.6) | 548 (71.4) |
| Human to human via skin direct contact | TRUE | 532 (72.7) | 681 (88.7) |
| Human to human via sexual route | TRUE | 305 (41.7) | 561 (73) |
| Airborne | TRUE | 496 (67.8) | 514 (66.9) |
| Droplets | TRUE | 344 (47) | 511 (66.5) |
| Food borne | FALSE | 652 (89.1) | 646 (84.1) |
| Contaminated water | FALSE | 654 (89.3) | 662 (86.2) |
| Other methods of transmission? | FALSE | 694 (94.8) | 735 (95.7) |
| **Mpox Symptoms and Signs** | | | |
| Fever | TRUE | 657 (89.8) | 731 (95.2) |
| Rash | TRUE | 655 (89.5) | 719 (93.6) |
| Headaches | TRUE | 551 (75.3) | 657 (85.5) |
| Lymphadenopathy | TRUE | 317 (43.3) | 536 (96.8) |
| Myalgias | TRUE | 358 (48.9) | 525 (68.4) |
| Exhaustion | TRUE | 183 (25) | 232 (30.2) |
| Respiratory distress | FALSE | 480 (65.6) | 527 (68.6) |
| Shock | FALSE | 670 (91.5) | 714 (93) |
| Seizures | FALSE | 674 (92.1) | 718 (93.5) |
| Loss of smell | FALSE | 648 (88.5) | 715 (93.1) |
| Acute kidney injury | FALSE | 685 (93.6) | 740 (96.4) |
| Precautionary Measures | | | |
| Contact precautions | TRUE | 591 (80.7) | 721 (93.9) |
| Airborne precautions | TRUE | 244 (33.3) | 205 (26.7) |

**Supplementary Table S2: Descriptive analysis of HCW's overall knowledge scores about Mpox disease.**

| Parameter | Pre-session, n=732 | Post session, n=768 | test statistic | p value |
| --- | --- | --- | --- | --- |
| Mean (SD)-Knowledge score | Mean (SD)-Knowledge score |
| Knowledge of Monkeypox disease and vaccines | 3.46 (1.33) | 4.41 (1.04) | *t=15.45, df=1498* | <0.001 |
| Knowledge of Monkeypox disease transmission | 5.5 (1.27) | 6.32 (1.17) | *t=13.01, df=1498* | <0.001 |
| Knowledge of Monkeypox disease signs and symptoms | 8.03 (1.66) | 8.87 (1.48) | *t=10.36, df=1498* | <0.001 |
| Knowledge of Monkeypox disease Precautionary measures | 1.56 (0.7) | 1.90 (0.66) | *t-9.33, df=1498* | <0.001 |
| Monkeypox Disease overall knowledge score | 18.57 (3.1) | 21.51 (2.84) | *t=20.33, df=1498.* | <0.001 |
